# Supplementary material for: Endothelial cell HSPA12B and yes-associated protein cooperatively regulate angiogenesis following myocardial infarction
Source: PubMed Central journal article supplement (PMC7526558; doi:10.1172/jci.insight.139640), 2020-09-17
Supplement: jciinsight-5-139640-s169.pdf [file jciinsight-5-139640-s169.pdf]

## Supplemental Figures

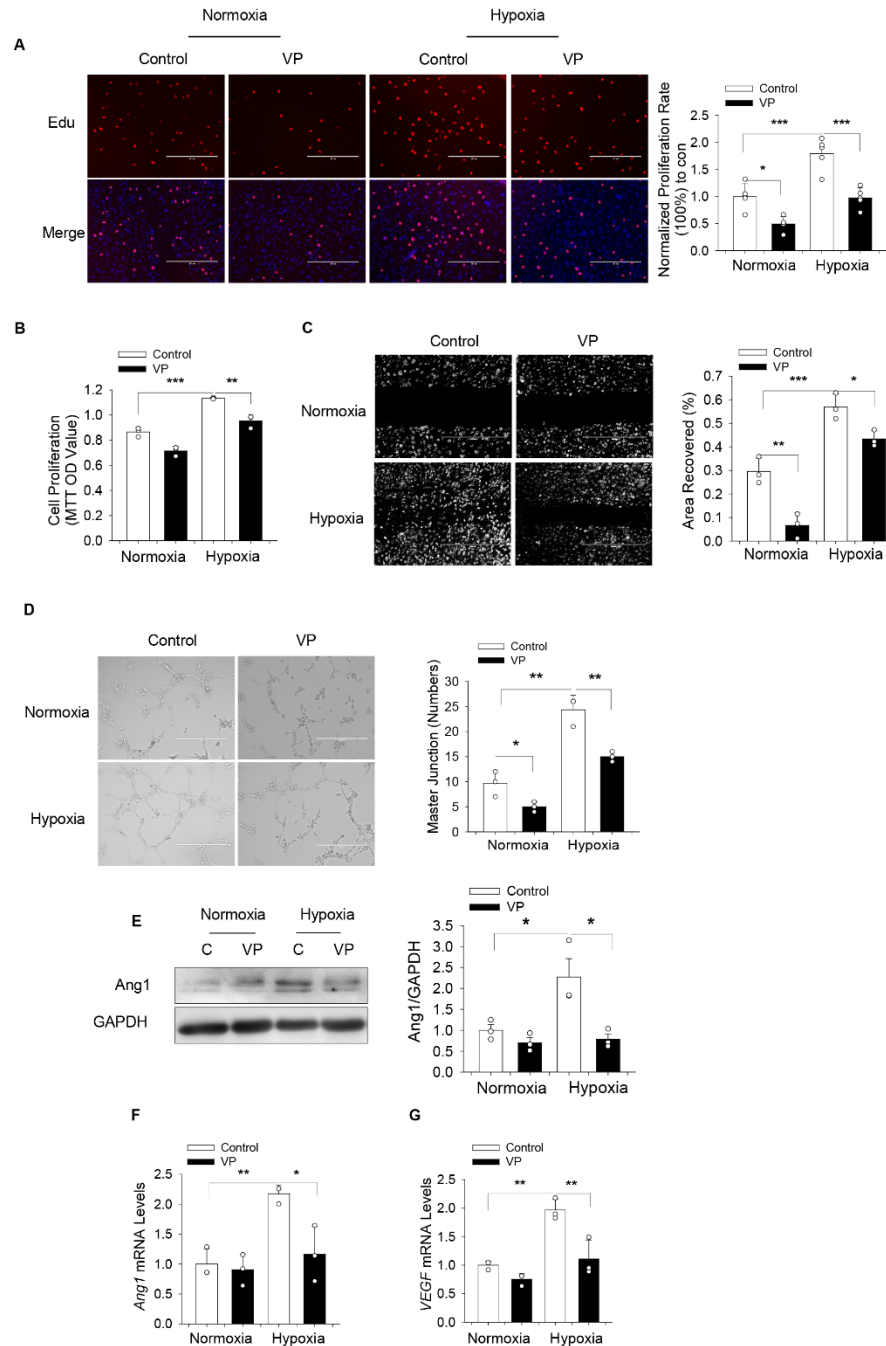

**Supplemental Figure 1. YAP inhibition suppresses hypoxia-induced endothelial cell proliferation, migration, and angiogenesis.** Endothelial cells were treated with YAP inhibitor, Verteporfin (VP, 1 mM/L) before the cells were subjected to hypoxic challenge. Endothelial cell proliferation was determined by Edu incorporation (**A**) and MTT assay (**B**), scale bars: 400µm. **C**, Cell migration was determined by wound-healing assay, scale bars: 400µm. **D**, Angiogenesis was examined by Matrigel assay, scale bars: 400µm. Expression of *Ang1* and *VEGF* were examined by Western blot (**E**) and qRT-PCR (**F-G**). n=3-5 independent experiments/group. Comparisons of data between groups were made using one-way ANOVA followed by Tukey's procedure. \* P < 0.05, \*\* P < 0.01, \*\*\* P < 0.001 compared with indicated group.

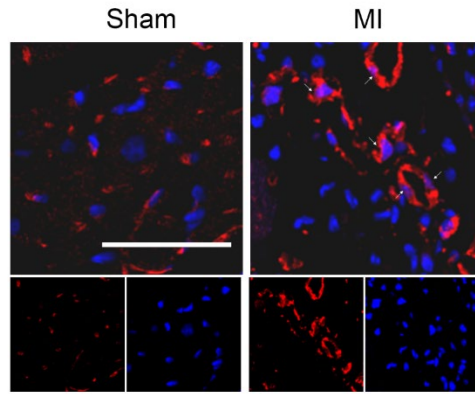

**Supplemental Figure 2. MI induced HSPA12B expression and nuclear translocation.** HSPA12B nuclear localization was examined by immunofluorescent staining with anti-HSPA12B antibody (red). Nucleus were stained with DAPI (blue). n=3/group. Scale bar: 100 $\mu$ m.

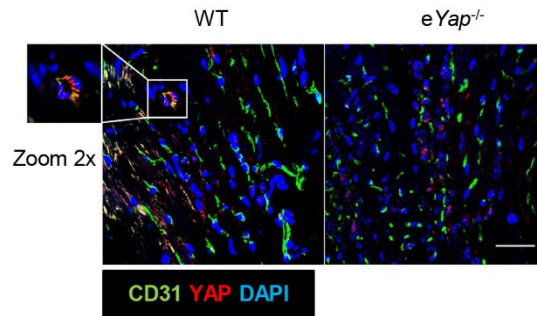

**Supplemental Figure 3.** Immunofluorescent staining of YAP expression in heart tissue sections. n=3/group. Scale bar: 50 $\mu$ m.

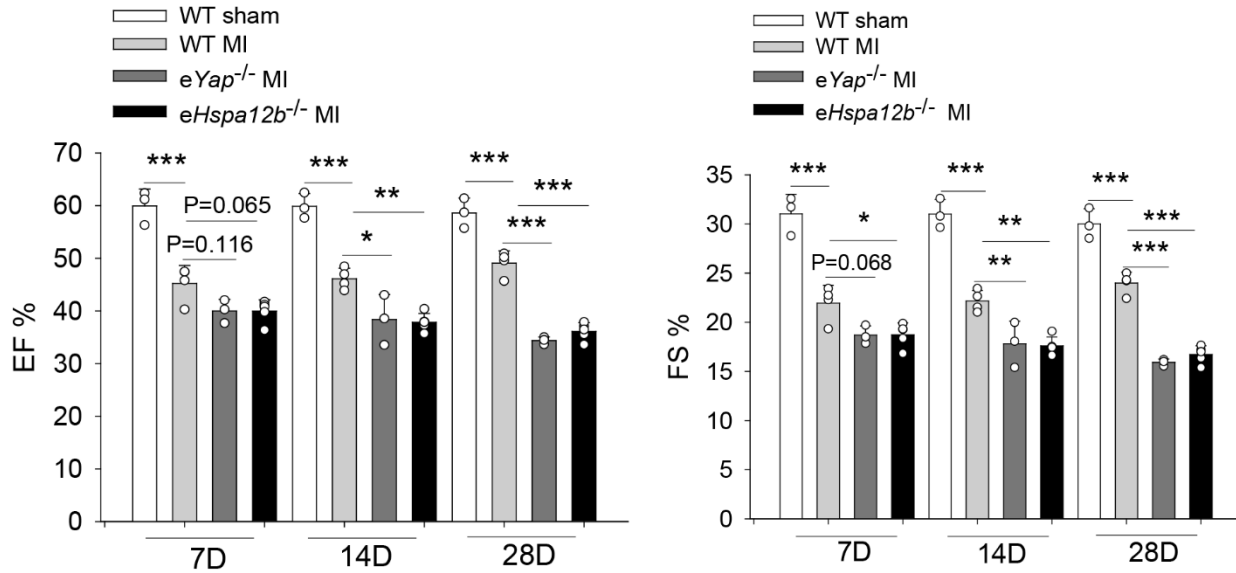

**Supplemental Figure 4. Endothelial specific *Hspa12b* (e*Hspa12b*<sup>-/-</sup>) or *Yap* (e*Yap*<sup>-/-</sup>) knockout mice exhibit an exacerbated cardiac dysfunction after MI.** Cardiac function was examined by echocardiography 7, 14 and 28 days after surgery among WT sham (n=3), WT MI (n=4), e*Yap*<sup>-/-</sup> MI (n=3) and e*Hspa12b*<sup>-/-</sup> MI (n=5) groups. Comparisons of data between groups were made using one-way ANOVA followed by Tukey's procedure. \* P < 0.05, \*\* P < 0.01, \*\*\* P < 0.001 compared with indicated group.

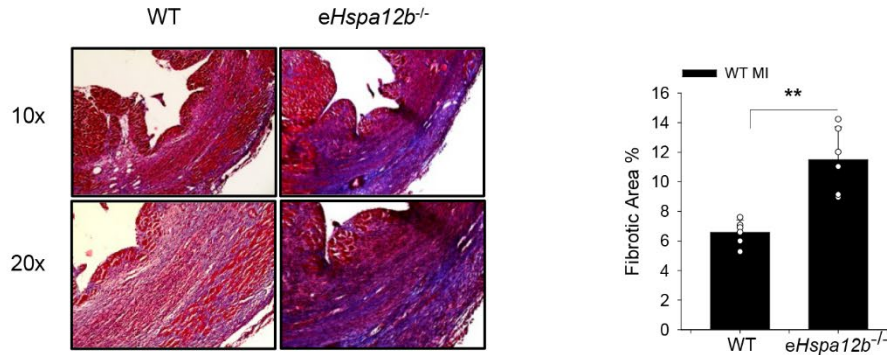

**Supplemental Figure 5. Endothelial specific *Hspa12b* knockout (e*Hspa12b*<sup>-/-</sup>) mice exhibit an increased cardiac fibrosis after MI.** Cardiac fibrosis was examined by staining of heart tissue sections with Trichrome stain (Masson) kit. n=6/group. Comparison of data between groups was made using t-test. \*\* P < 0.01 compared with indicated groups.

**Table 1. PCR primers used for CHIP analysis.**

| <b>Names</b>           | <b>Sequences (5'-&gt;3')</b> |
|------------------------|------------------------------|
| HSPA12B Forward Primer | TGCTGATATGGCGTGGAGAC         |
| HSPA12B Reverse Primer | CACCCCCTTCTGGTCAGTTC         |
| YAP Forward Primer     | GCGGATATGAACATGGCTGCT        |
| YAP Reverse Primer     | TGGGCAAAGTTCCTATGCTG         |
| CTGF Forward Primer    | AGGCTTTTATACGCTCCGGG         |
| CTGF Reverse Primer    | TGAGTGTC AAGGGGTCAGGA        |
